# Supplementary material for: Gastroprotective Activity of Parastrephia quadrangularis (Meyen), Cabrera from the Atacama Desert
Source: PubMed Central journal article supplement (PMC6225235; doi:10.3390/molecules23092361), 2018-09-15

**Supplementary material for the article: Gastroprotective activity of *Parastrephia quadrangularis* (Meyen), Cabrera from the Atacama Desert**

Alejandro Ardiles<sup>1</sup>, Ruth Barrientos<sup>2</sup>, Mario J. Simirgiotis<sup>2,3\*</sup>, Jorge Bórquez<sup>4</sup>, Beatriz Sepulveda<sup>5</sup>, Carlos Areche<sup>6\*</sup>

<sup>1</sup>Departamento de Química y Farmacia, Facultad de Ciencias, Universidad Católica del Norte, Angamos 0610, Antofagasta, Chile.

<sup>2</sup>Instituto de Farmacia, Facultad de Ciencias, Universidad Austral de Chile, Casilla 567, Valdivia, 5090000, Chile

<sup>3</sup>Center for Interdisciplinary Studies on the Nervous System (CISNe), Universidad Austral de Chile, Valdivia 5090000, Chile

<sup>4</sup>Laboratorio de Productos Naturales, Departamento de Química, Facultad de Ciencias Básicas, Universidad de Antofagasta, Casilla 170, Antofagasta, 1240000, Chile

<sup>5</sup>Departamento de Ciencias Químicas, Universidad Andres Bello, Campus Viña del Mar, Quillota 980, Viña del Mar, 2520000, Chile

<sup>6</sup>Departamento de Química, Facultad de Ciencias, Universidad de Chile, Santiago, 8320198, Chile

**Table S1.** <sup>1</sup>H NMR data, HMBC and COSY correlations for compound **6** in CDCl<sub>3</sub> (J in Hz in parentheses)

| Proton     | $\delta_{\text{H}}$ mult.<br>(J in Hz) | COSY<br>(H→H)              | HMBC<br>(H→C) |
|------------|----------------------------------------|----------------------------|---------------|
| 2 $\beta$  | 5.46 d (8.8)                           | H-3 $\alpha$ , H-3 $\beta$ |               |
| 3 $\alpha$ | 3.28 dd (15.9, 7.8)                    | H-3 $\beta$ , H-2 $\beta$  |               |
| 3 $\beta$  | 3.50 dd (15.9, 9.8)                    | H-3 $\alpha$ , H-2 $\beta$ |               |

|    |               |      |           |
|----|---------------|------|-----------|
| 4  | 7.85 s        |      |           |
| 6  | 7.83 d (8.5)  | H-7  | C-4, 7a   |
| 7  | 6.84 d (8.3)  | H-6  | C-5, 7a   |
| 9  | 2.50 s        |      | C-5,8     |
| 11 | 4.84 (13.4)   | H-12 | C-12,10   |
| 12 | 5.38 d (8.8)  | H-11 | C-11,2,10 |
| 2' | 7.40 d (8.6)  |      |           |
| 3' | 7.53 d (8.6)  |      |           |
| 4' | 7.40 m        |      |           |
| 5' | 7.53 d (8.6)  |      |           |
| 6' | 7.40 d (8.6)  |      |           |
| 7' | 7.65 d (15.9) | H-8' | C-9', 1'  |
| 8' | 6.39 (15.9)   | H-7' |           |

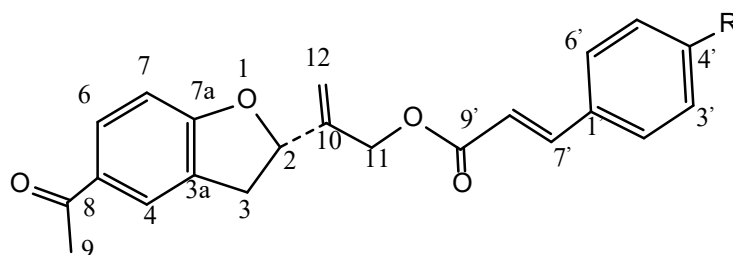

Compound **6** R= H  
 Compound **7** R= OH

**Table S2.**  $^{13}\text{C}$  NMR data (100.25 MHz) for compounds **6** and **7**

| C# | <b>6</b> | <b>7</b> |
|----|----------|----------|
| 2  | 84.6 d   | 84.5 d   |
| 3  | 35.1 t   | 34.7 t   |
| 3a | 129.0 s  | 127.4 s  |
| 4  | 125.5 d  | 125.7 d  |
| 5  | 134.4 s  | 130.7 s  |
| 6  | 130.6    | 130.8 d  |
| 7  | 109.4 d  | 114.4 d  |
| 7a | 162.8 s  | 163.9 s  |
| 8  | 196.8 s  | 197.7 s  |
| 9  | 26.4 q   | 26.3 q   |

|    |         |         |
|----|---------|---------|
| 10 | 141.8 s | 142.6 s |
| 11 | 63.8 t  | 63.8 t  |
| 12 | 114.8 t | 115.3 t |
| 1' | 127.2 s | 126.3 s |
| 2' | 128.2 d | 116.0 d |
| 3' | 129.0 d | 130.1 d |
| 4' | 128.5 d | 158.5 s |
| 5' | 129.0 d | 130.1 d |
| 6' | 128.2 d | 116.0 d |
| 7' | 145.5 d | 145.4 d |
| 8' | 117.8 d | 108.9 d |
| 9' | 166.9 s | 167.1 s |

Figure S1a-i). Full high-resolution mass spectra and structures of peaks 1, 2, 10, 16, 17, 18, 20, 25, 28, 30, 36 and 40.

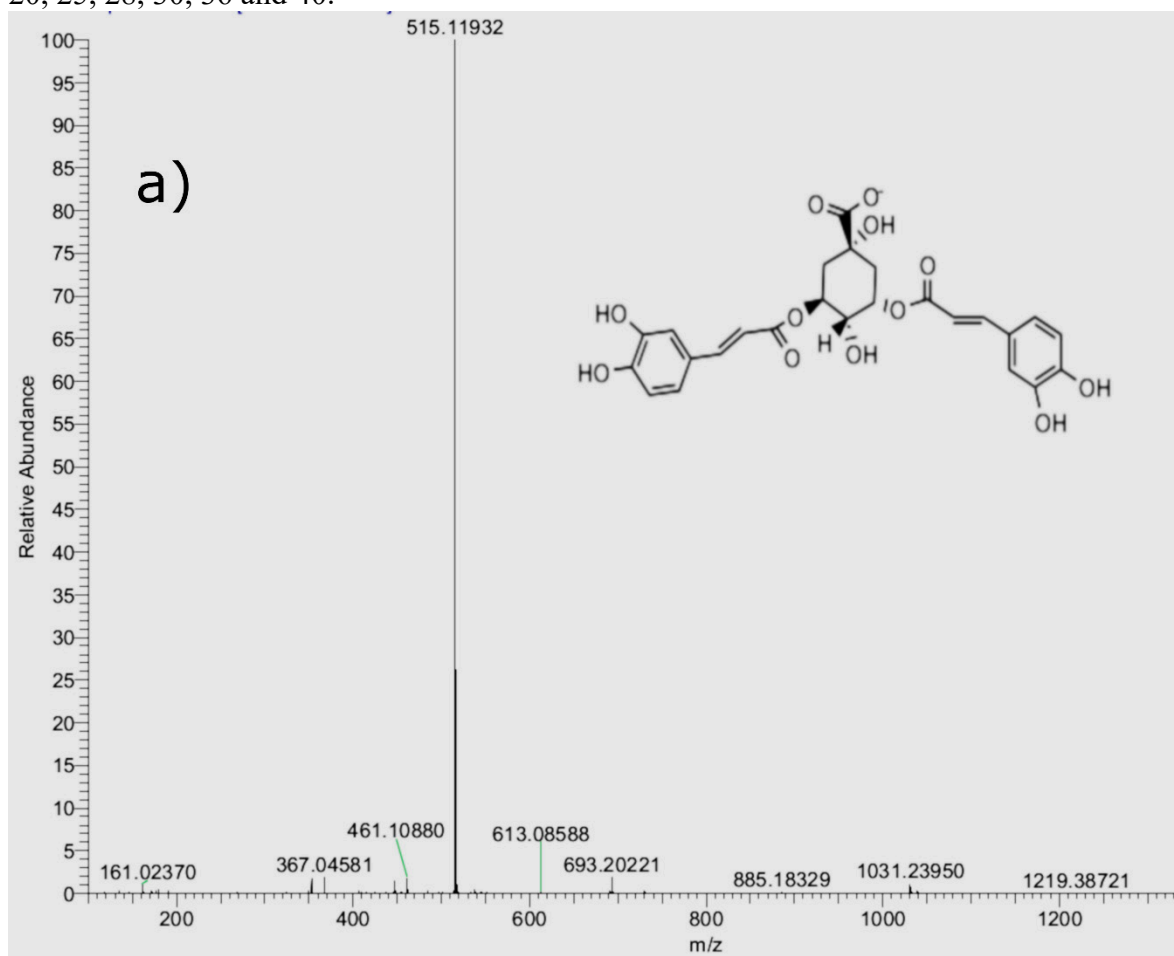

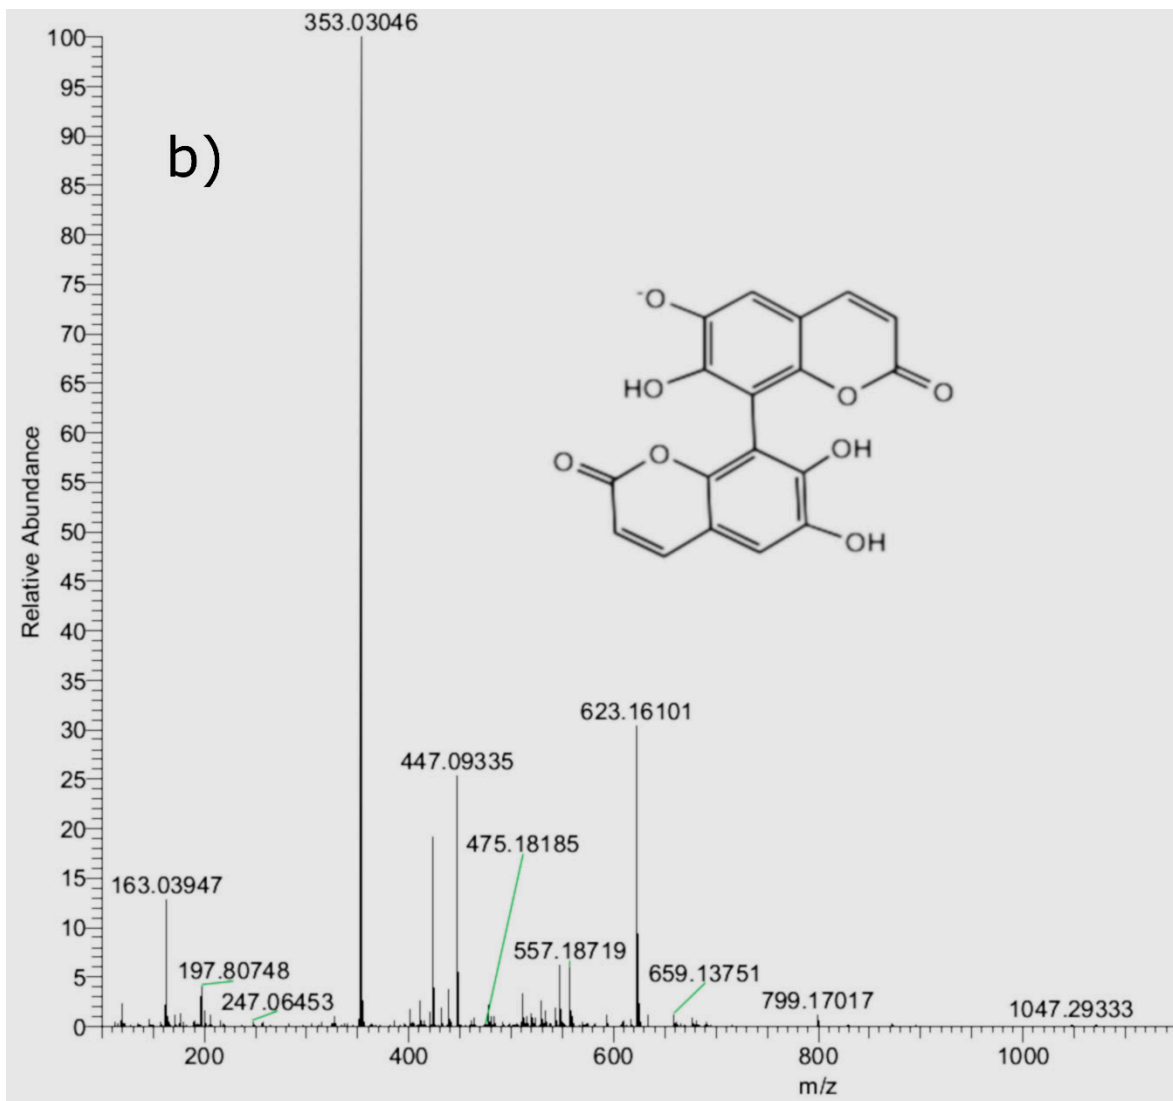

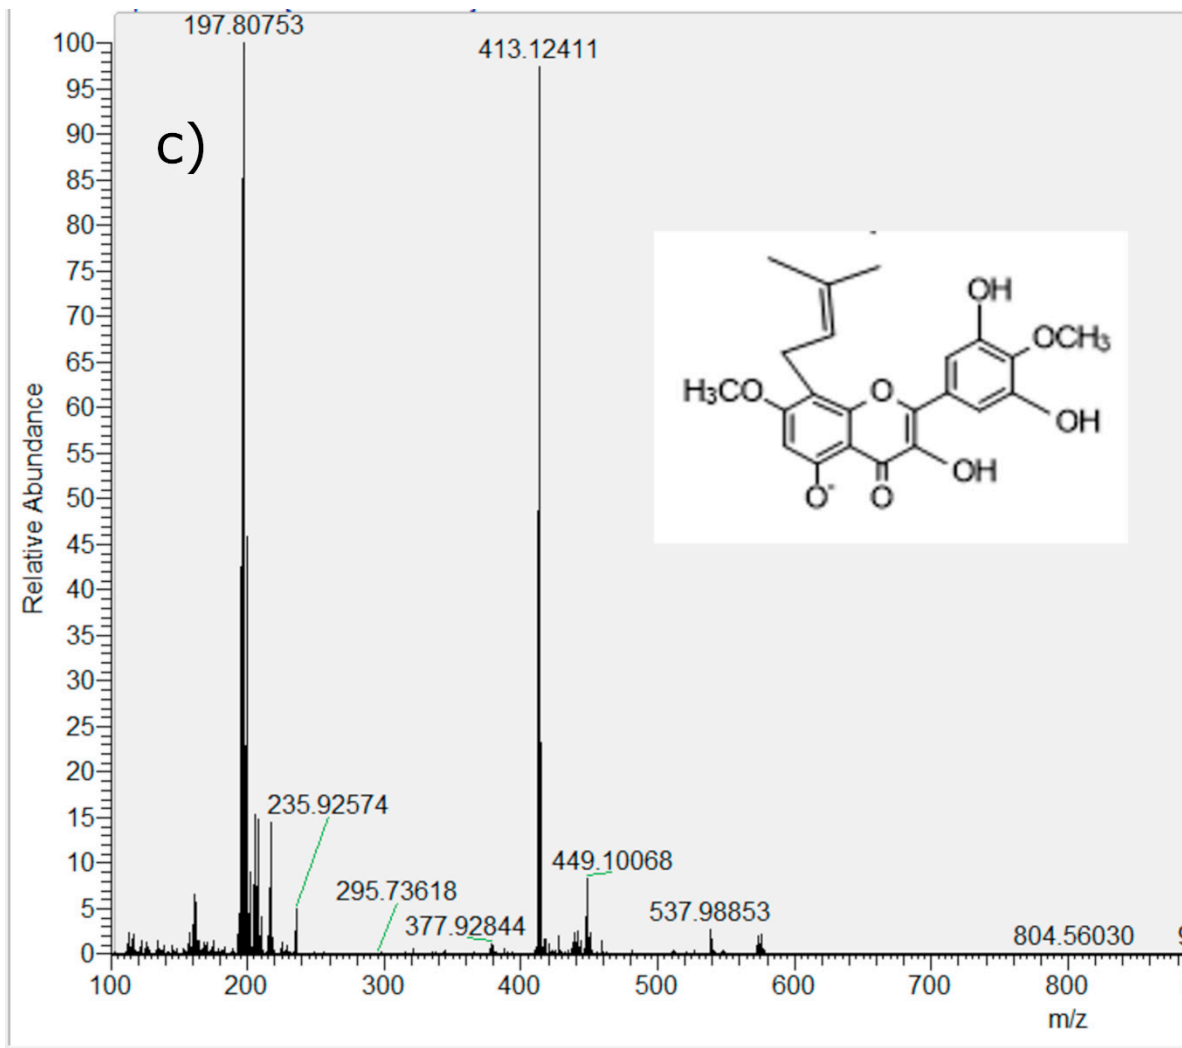

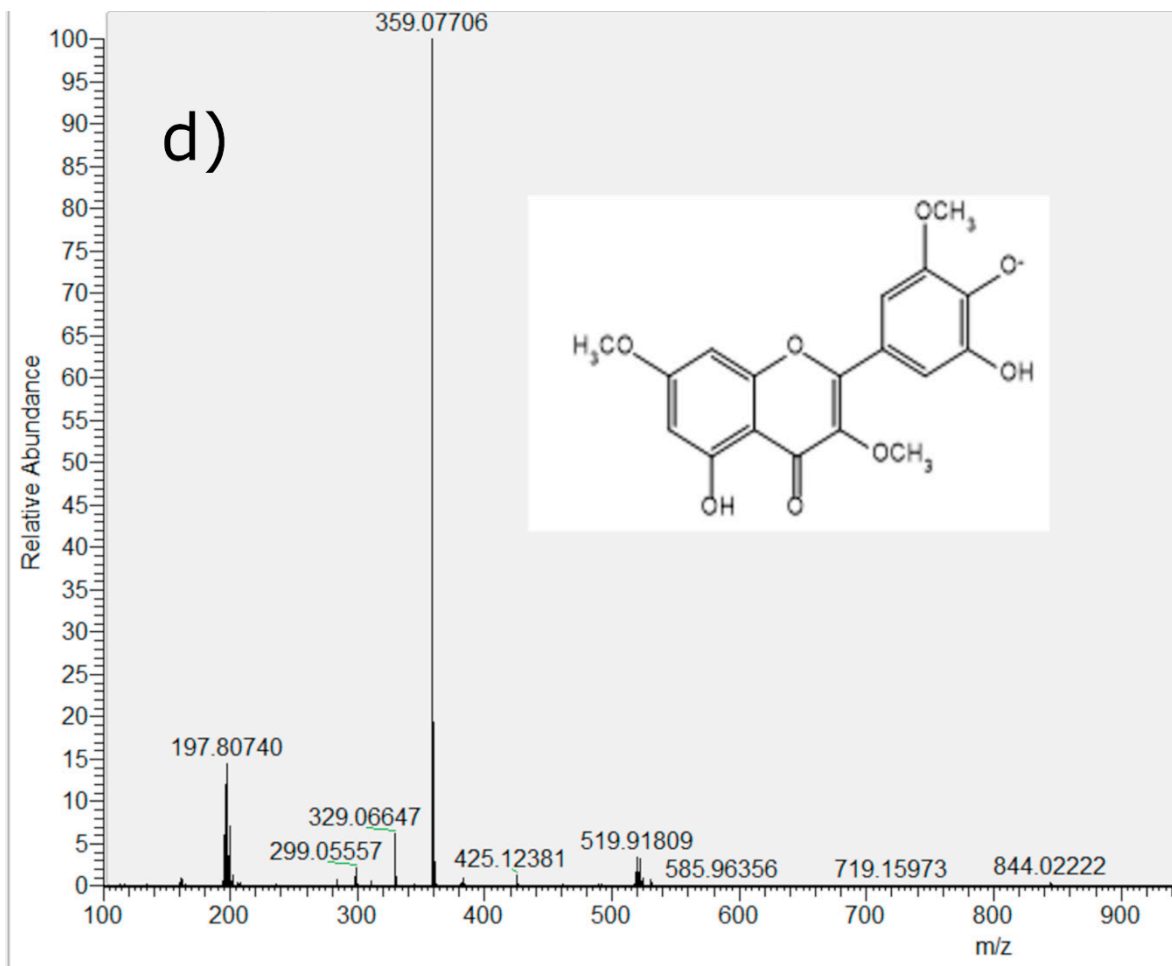

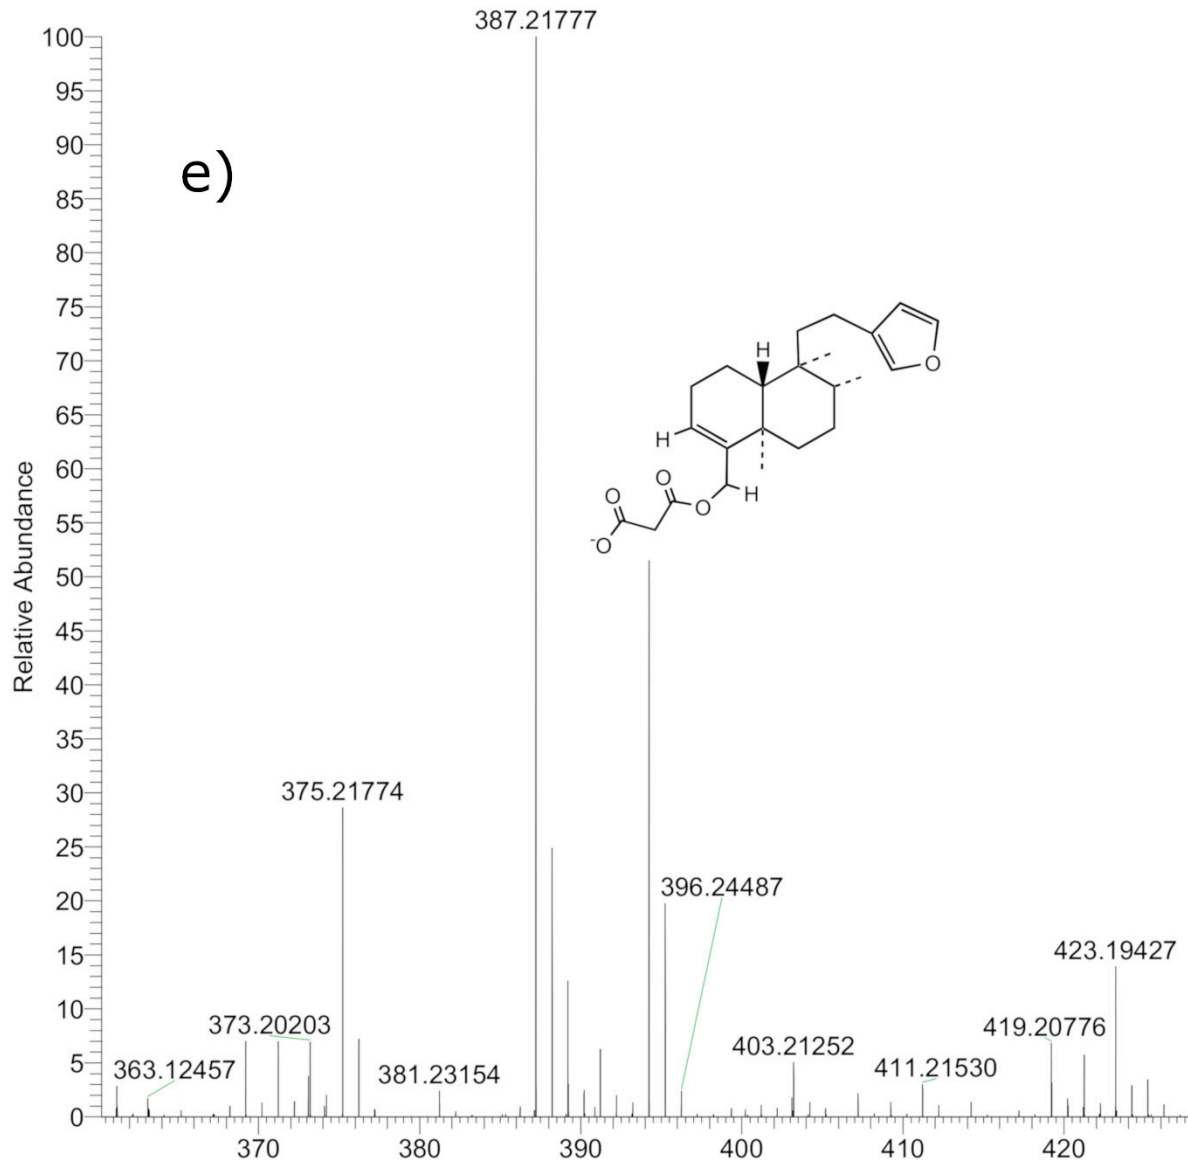

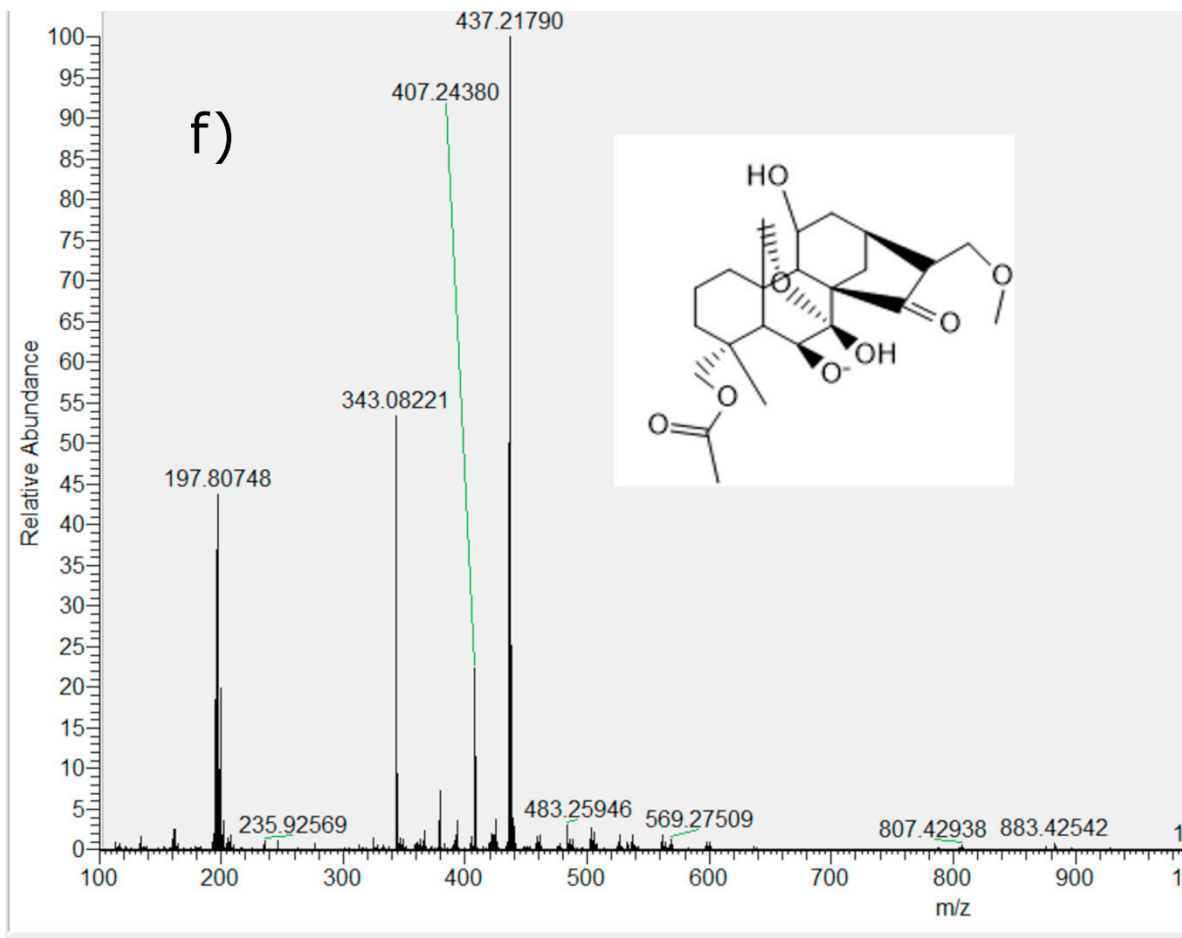



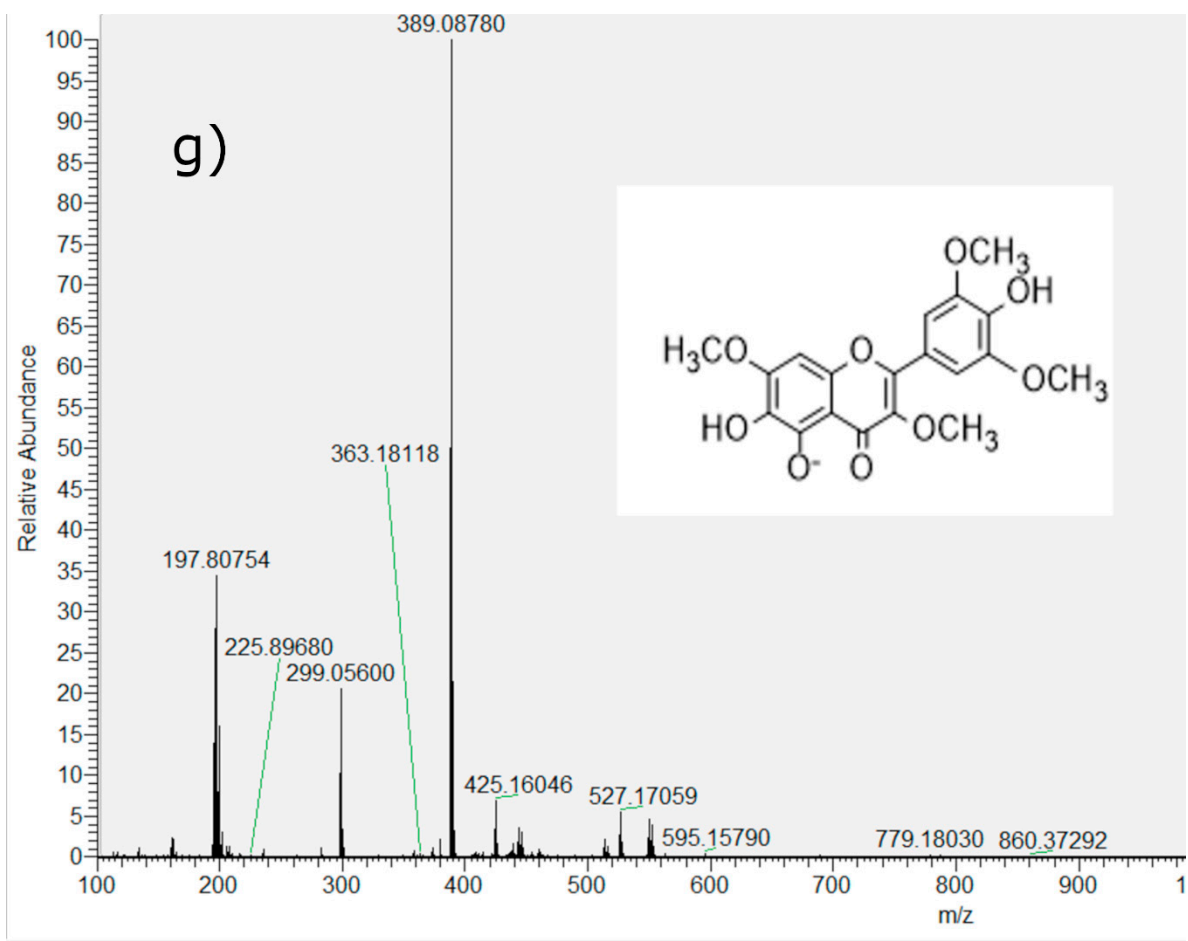

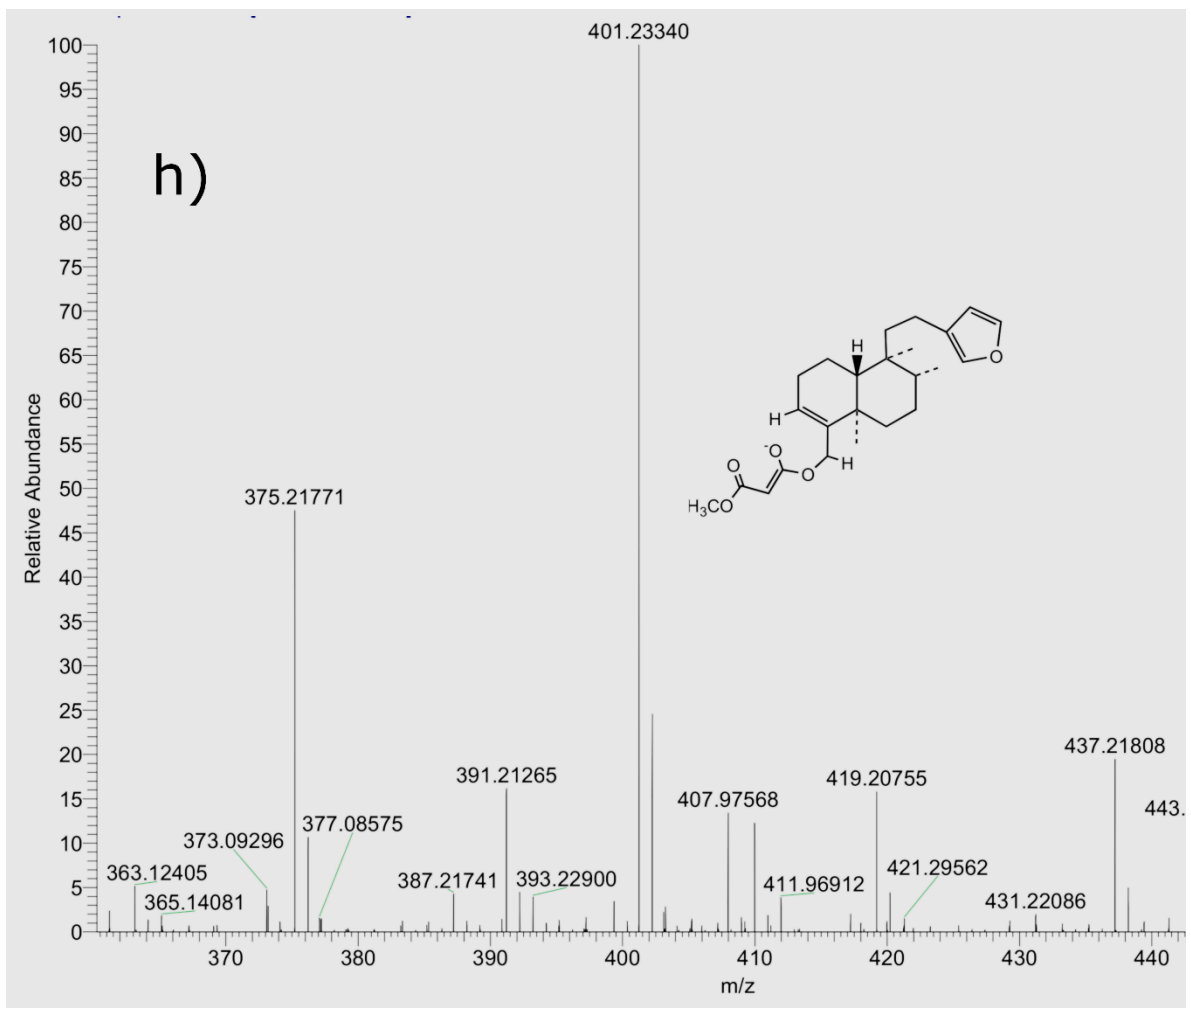

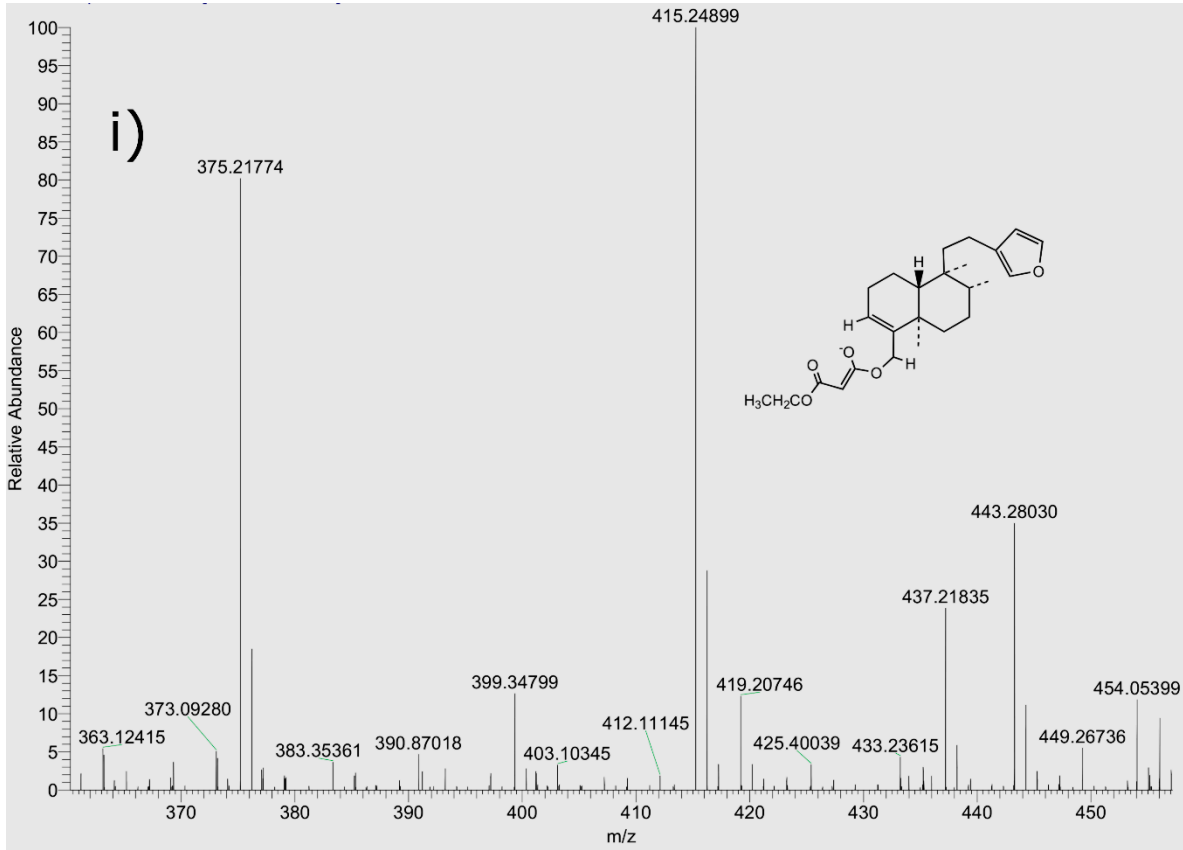

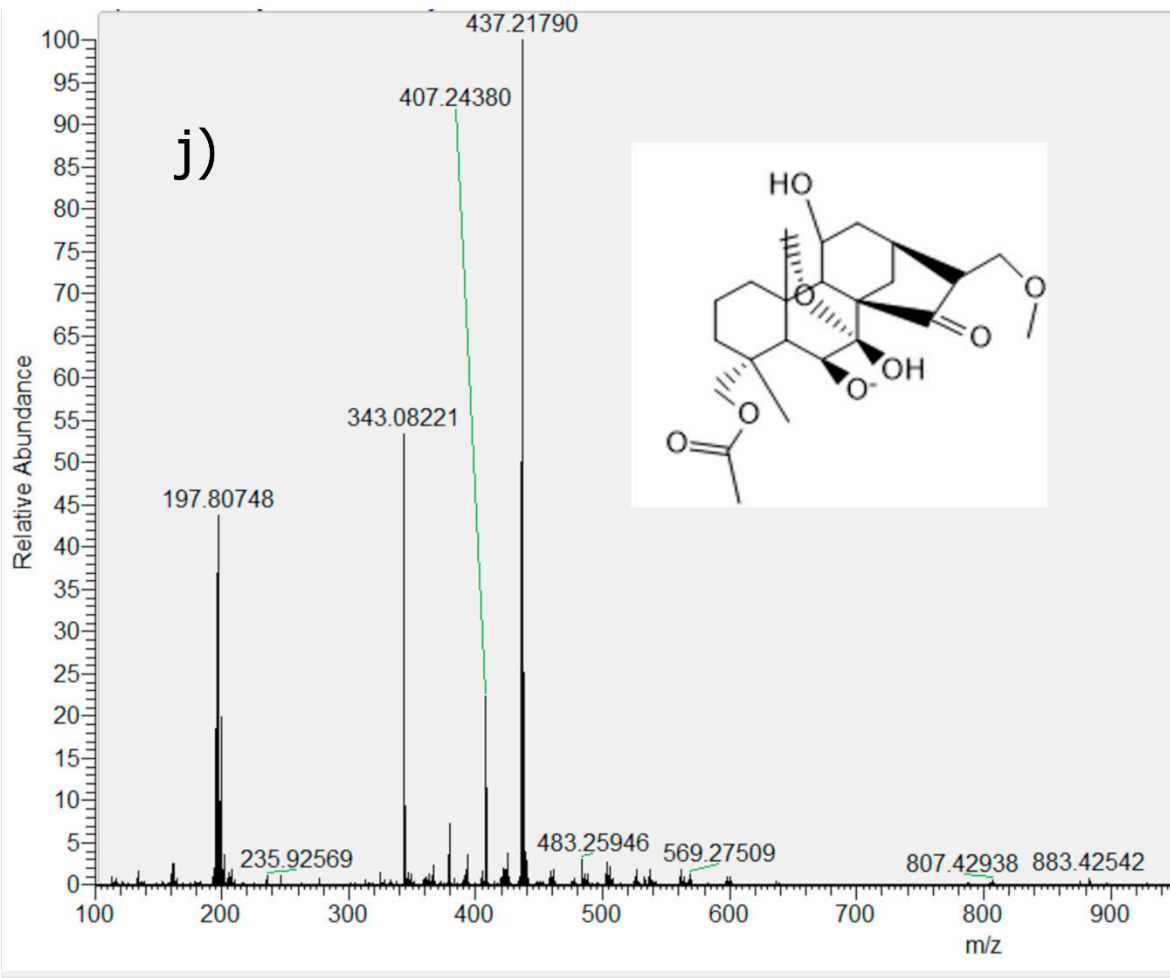

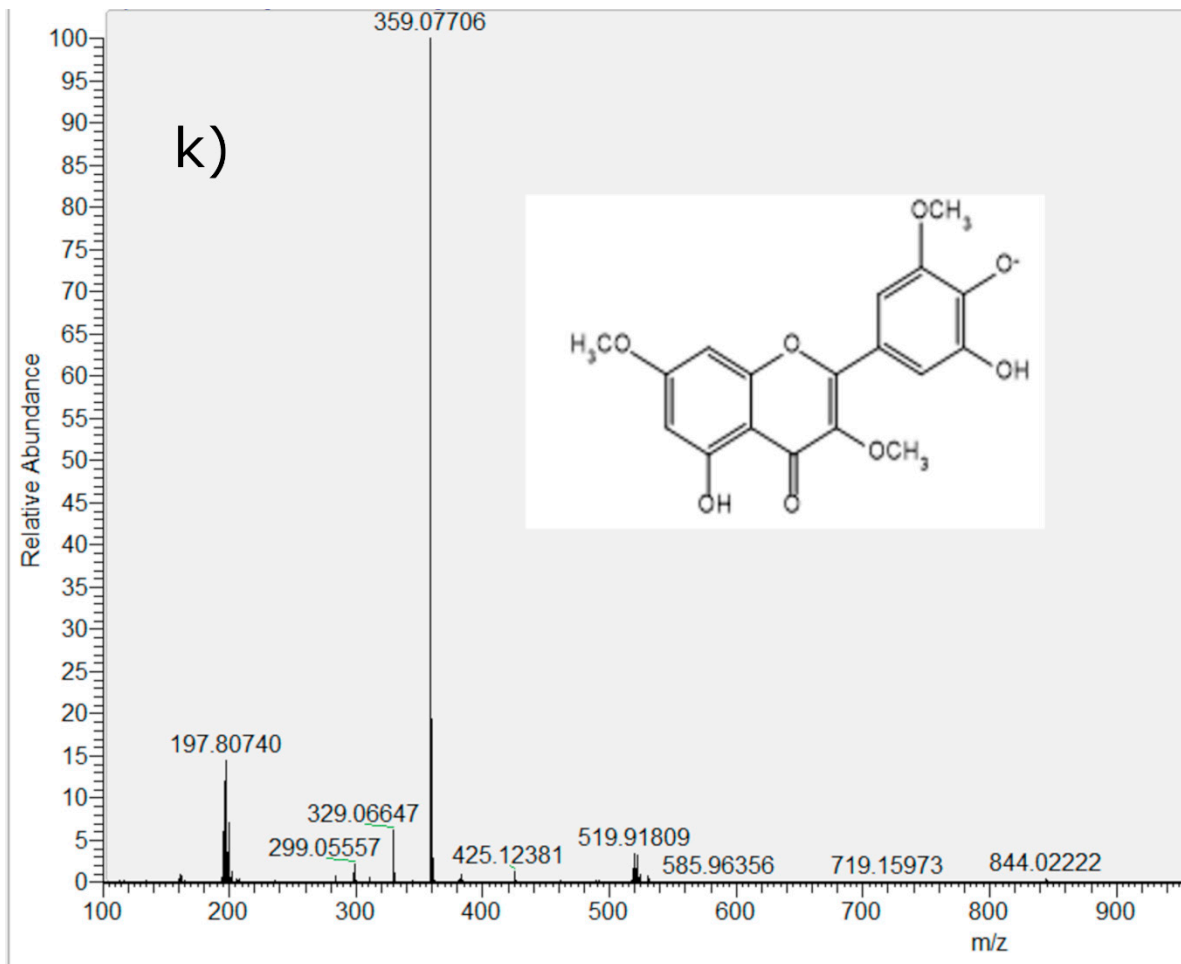

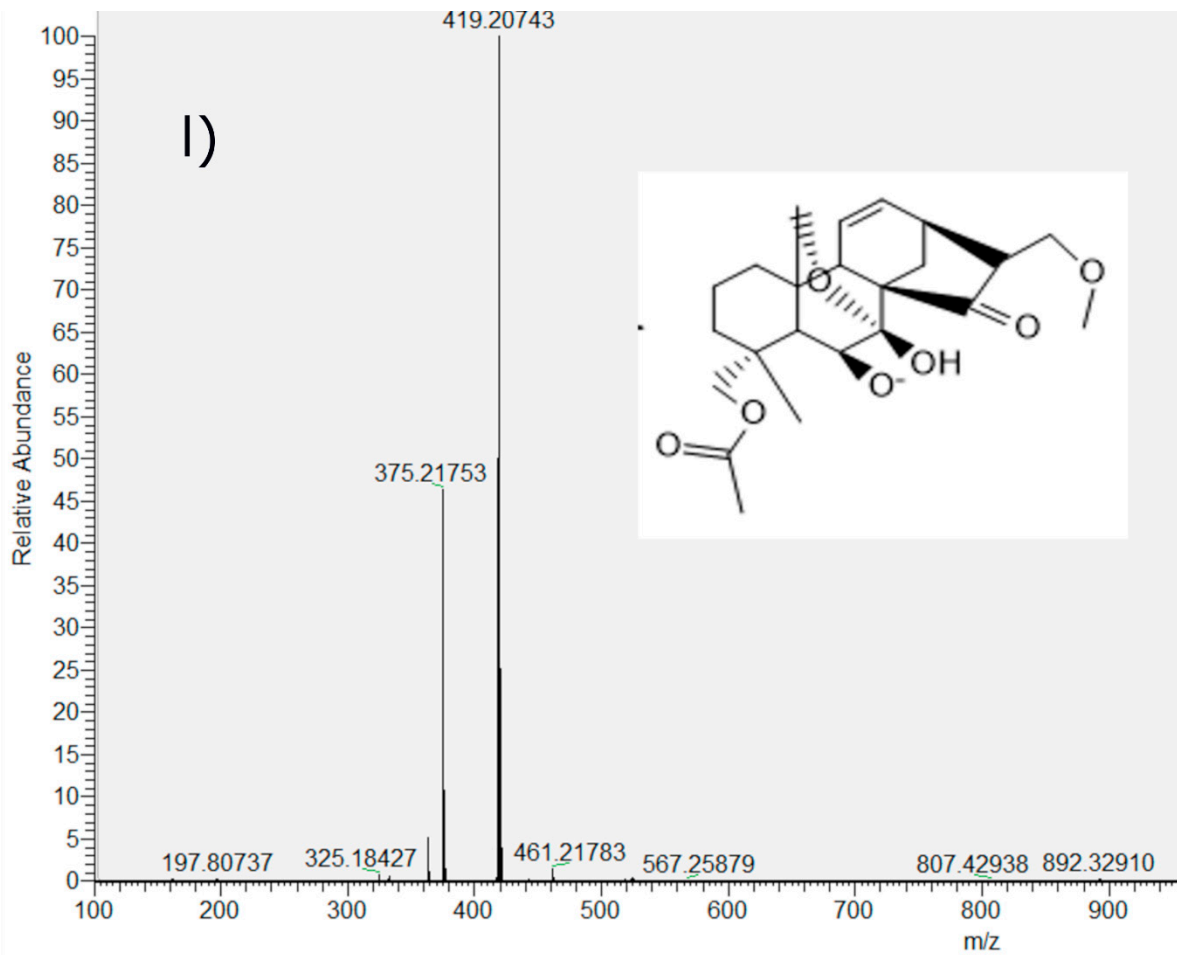

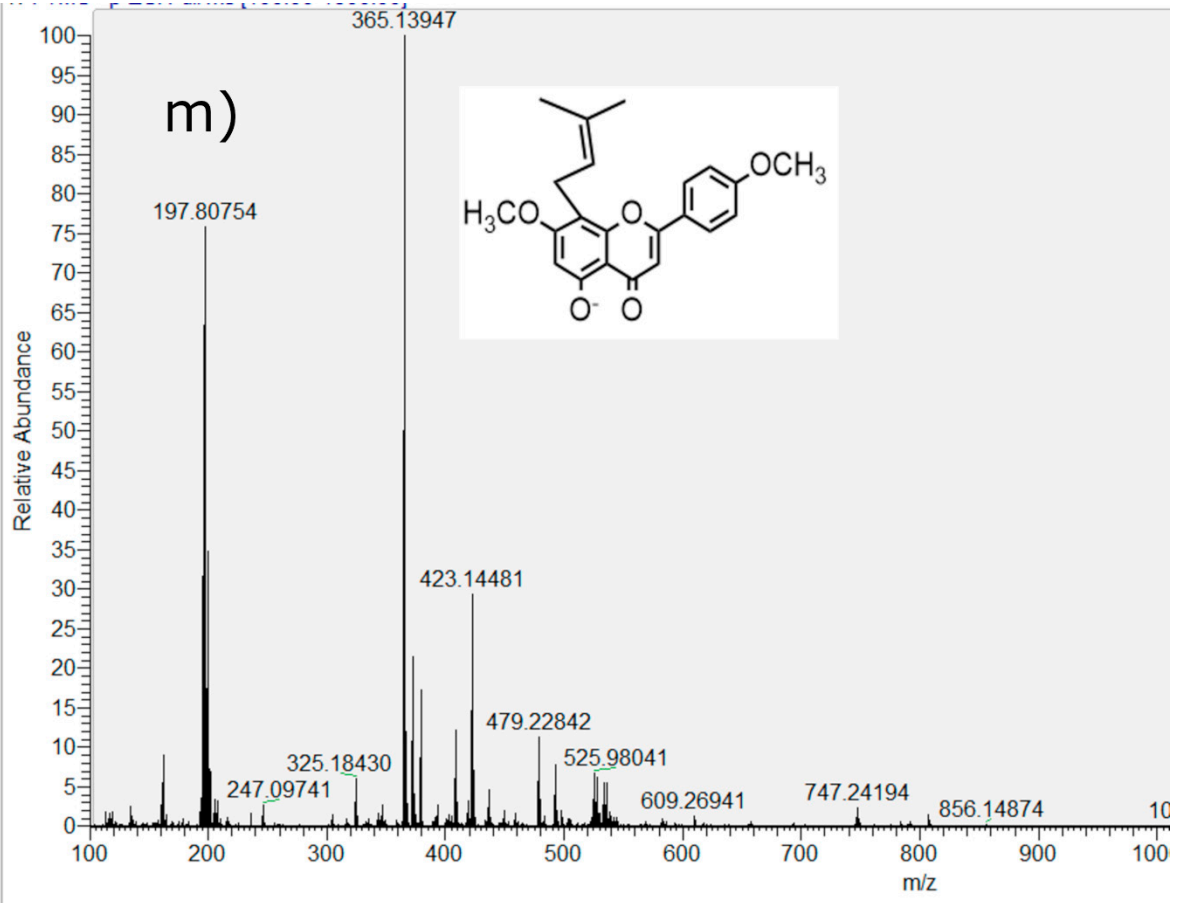

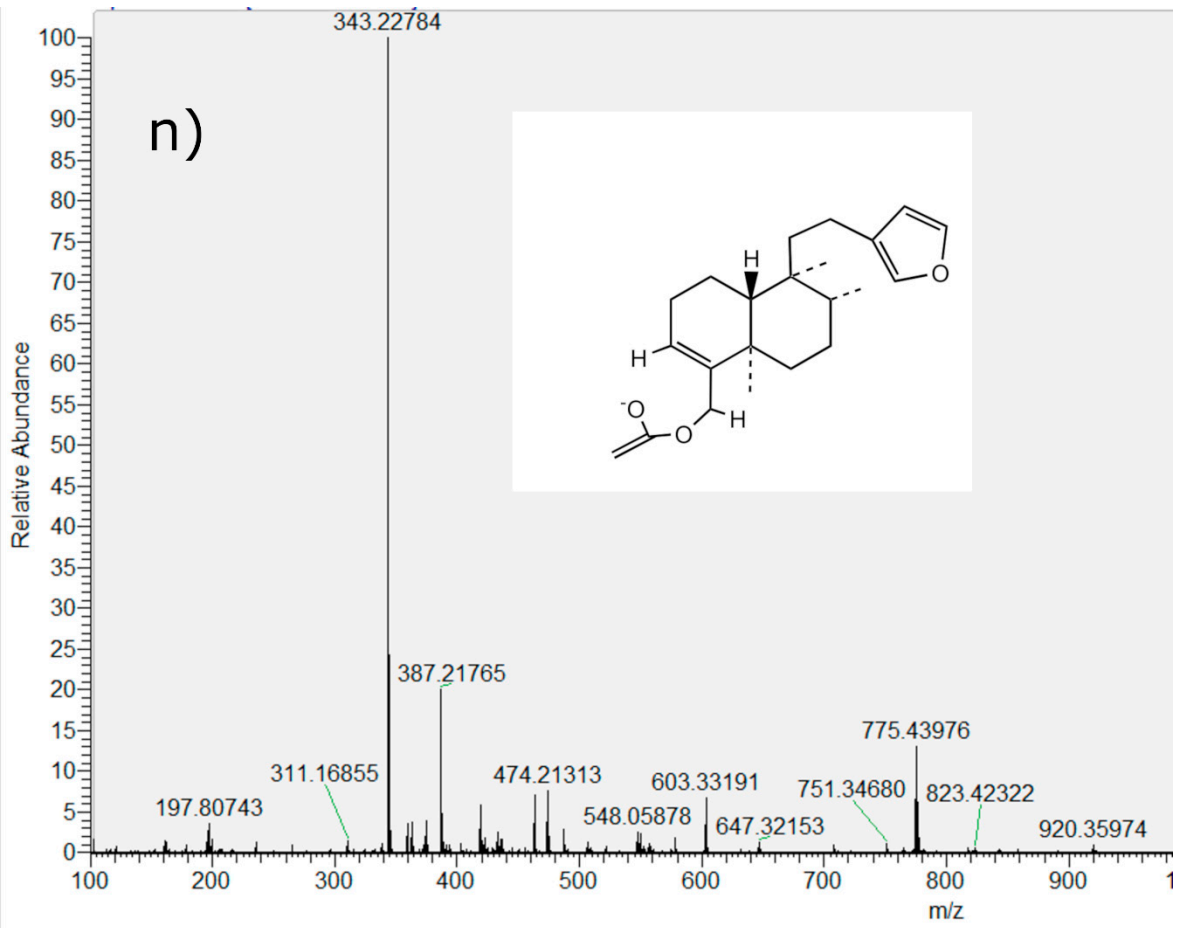



**Fig. S2.** NMR spectra of a malonyl diterpene (compound **4**) and tremetones **6** and **7**.  
S2a. Proton NMR spectra of compound **4**.

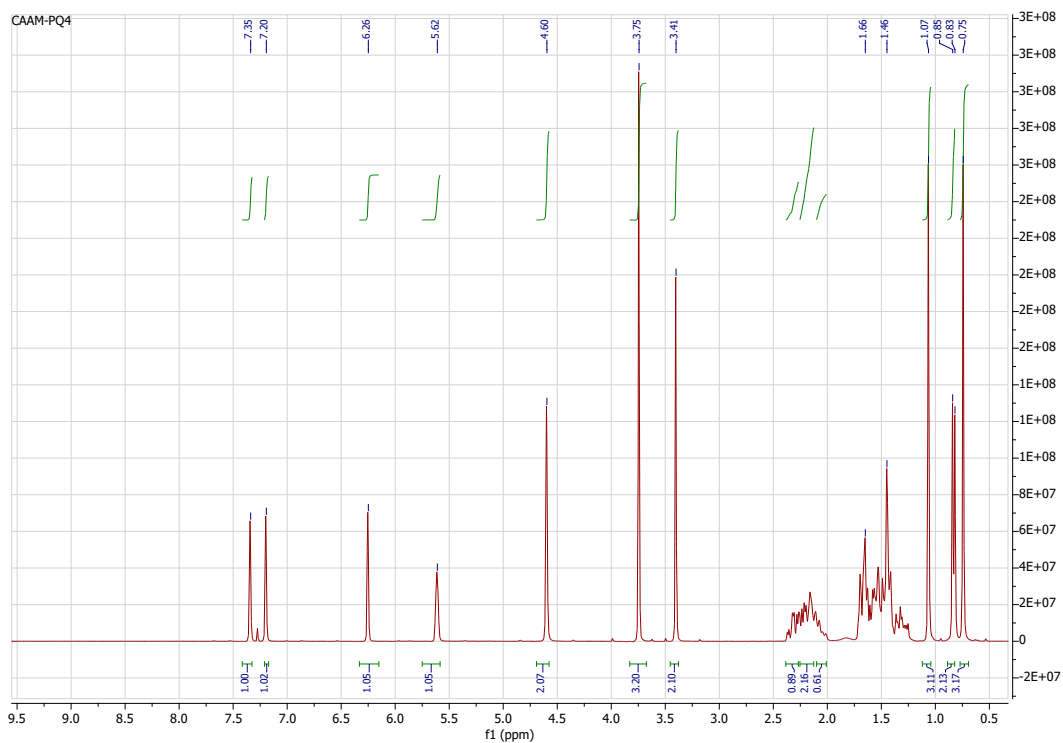

**S2b.** Carbon NMR spectra of compound **4**.

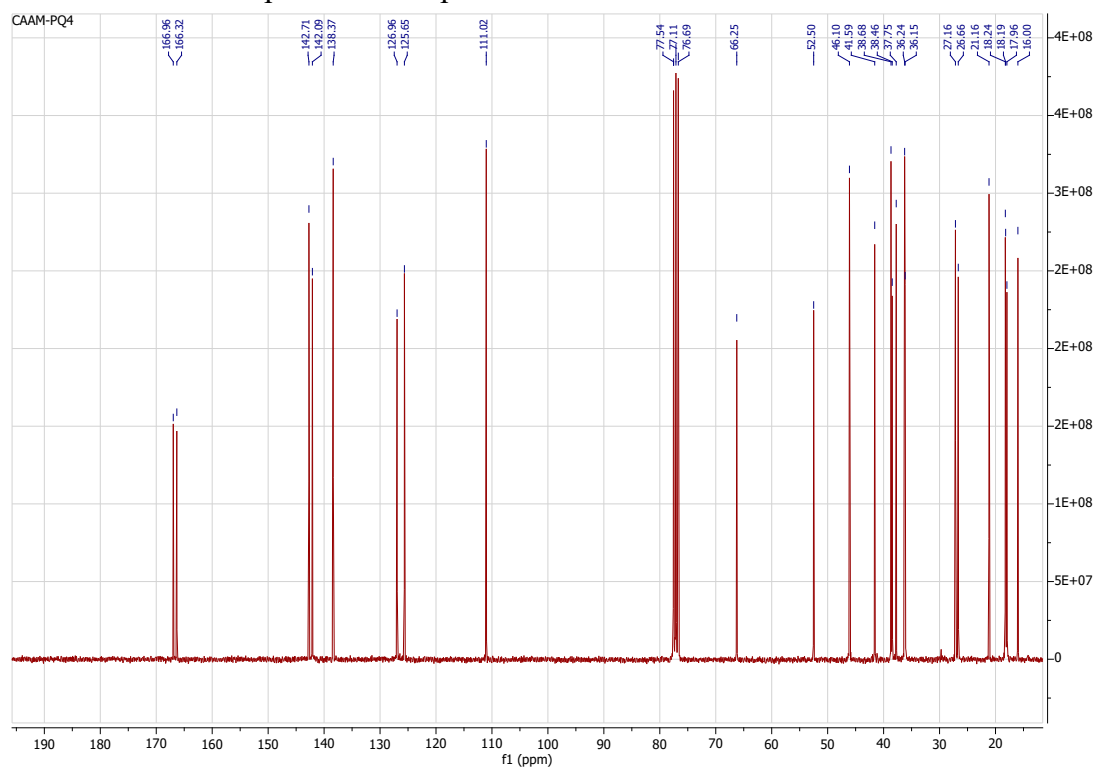

S2c. HSQC spectra of compound 4.

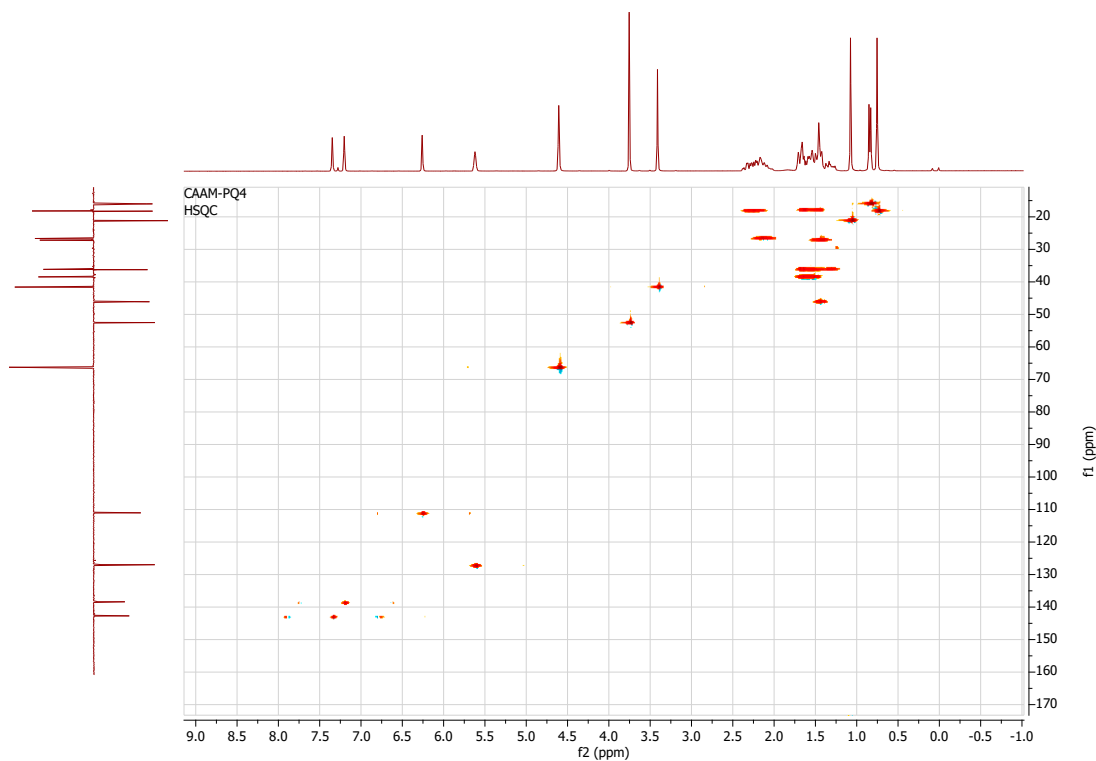

S2d. Proton NMR spectra of compound 4.

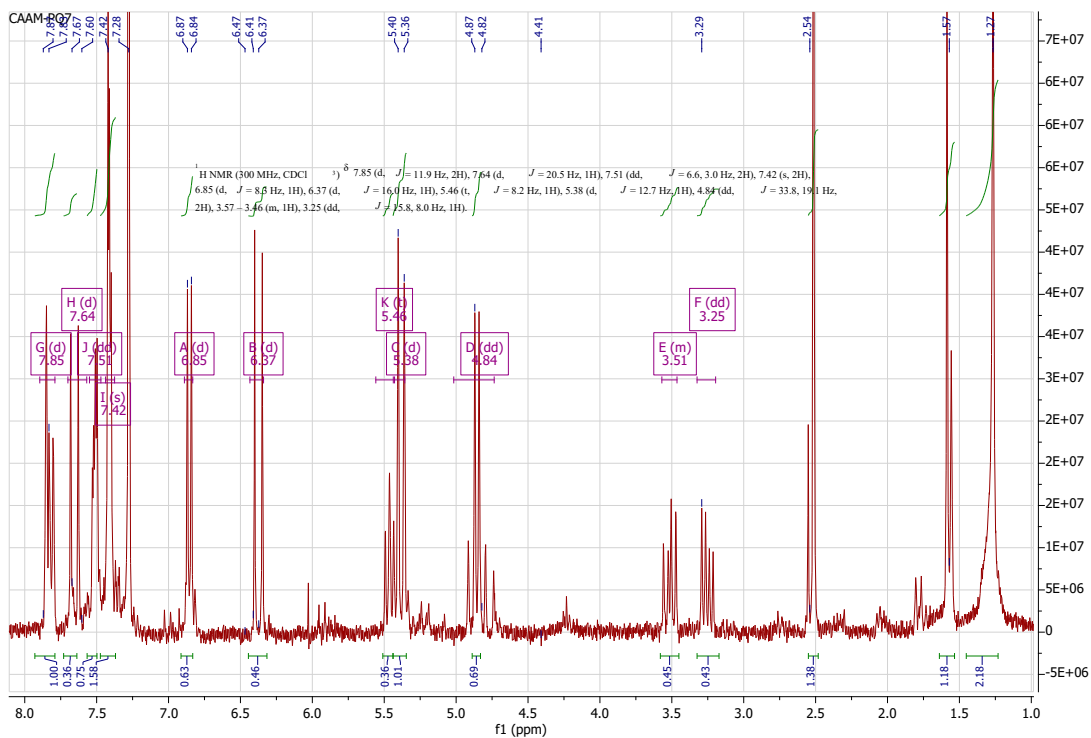

### S2f. Carbon NMR spectra of compound 6.

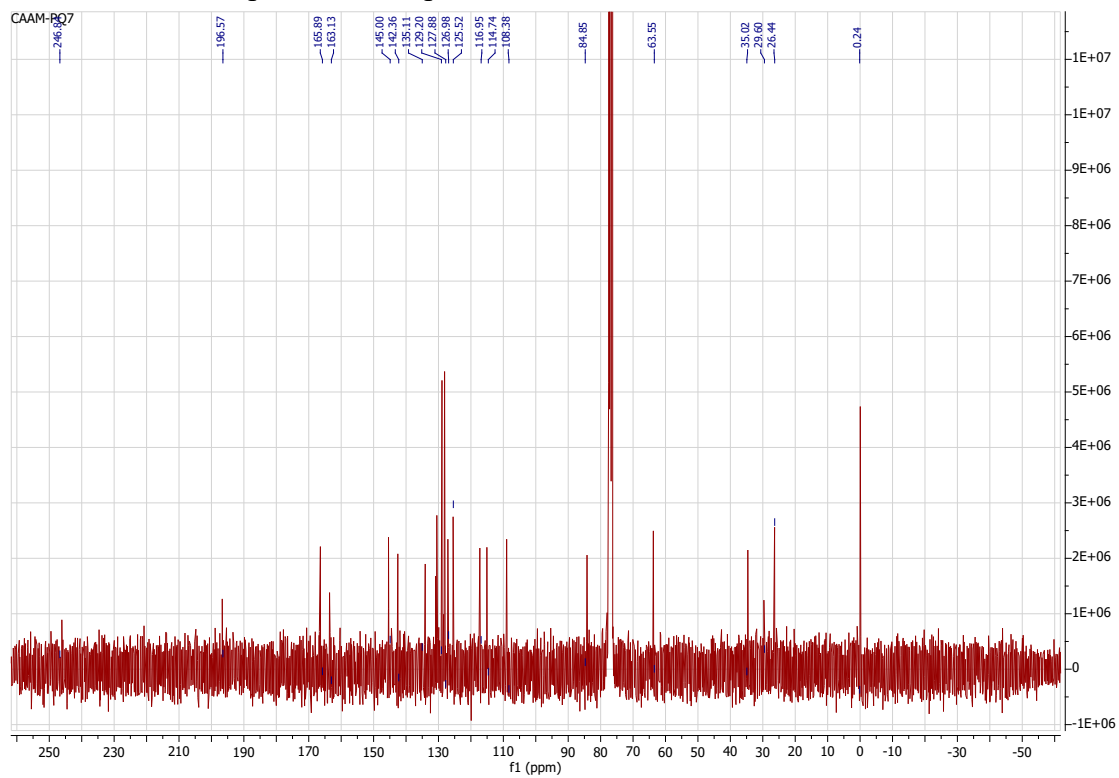

### S2g. COSY spectra of compound 6.

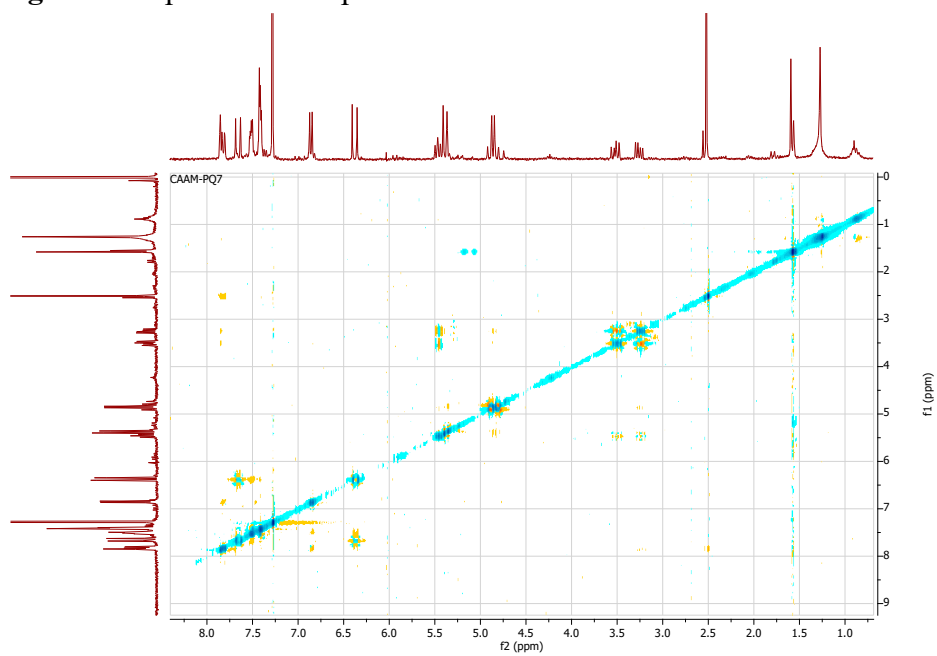

S2h. HSQC spectra of compound 6.

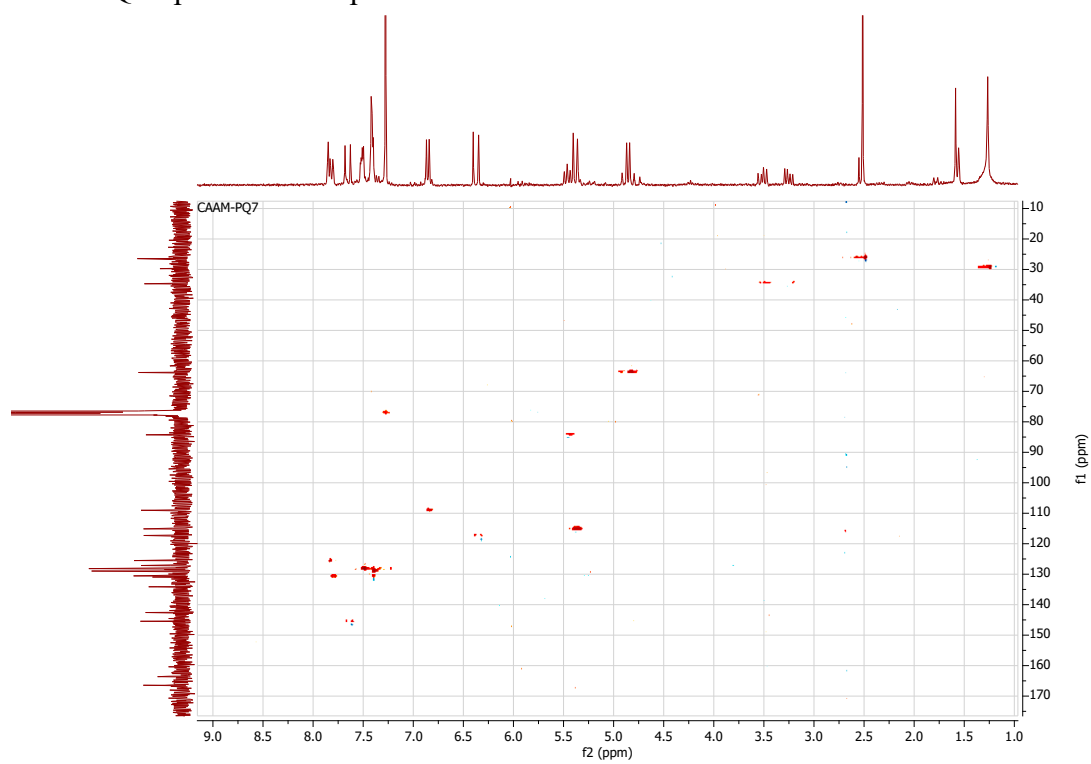

S2i. HMBC spectra of compound 6.

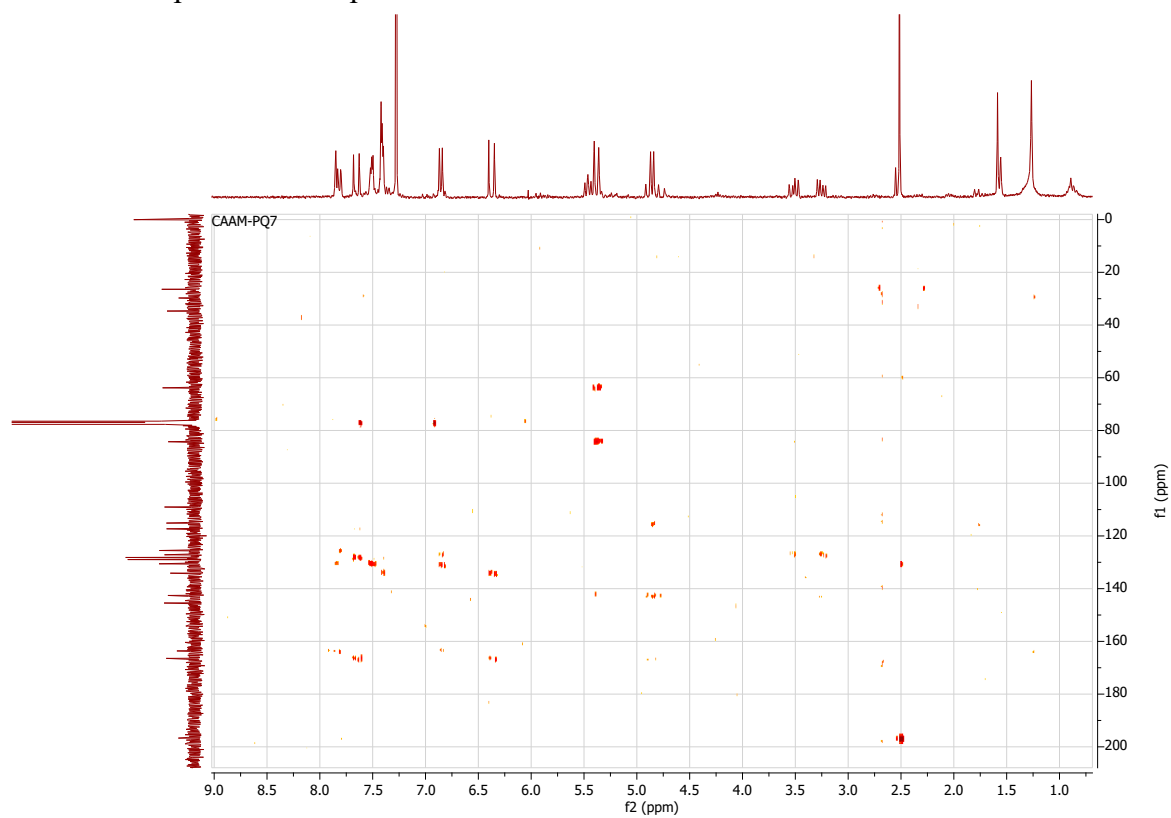

S2j. Proton NMR spectra of compound 7.

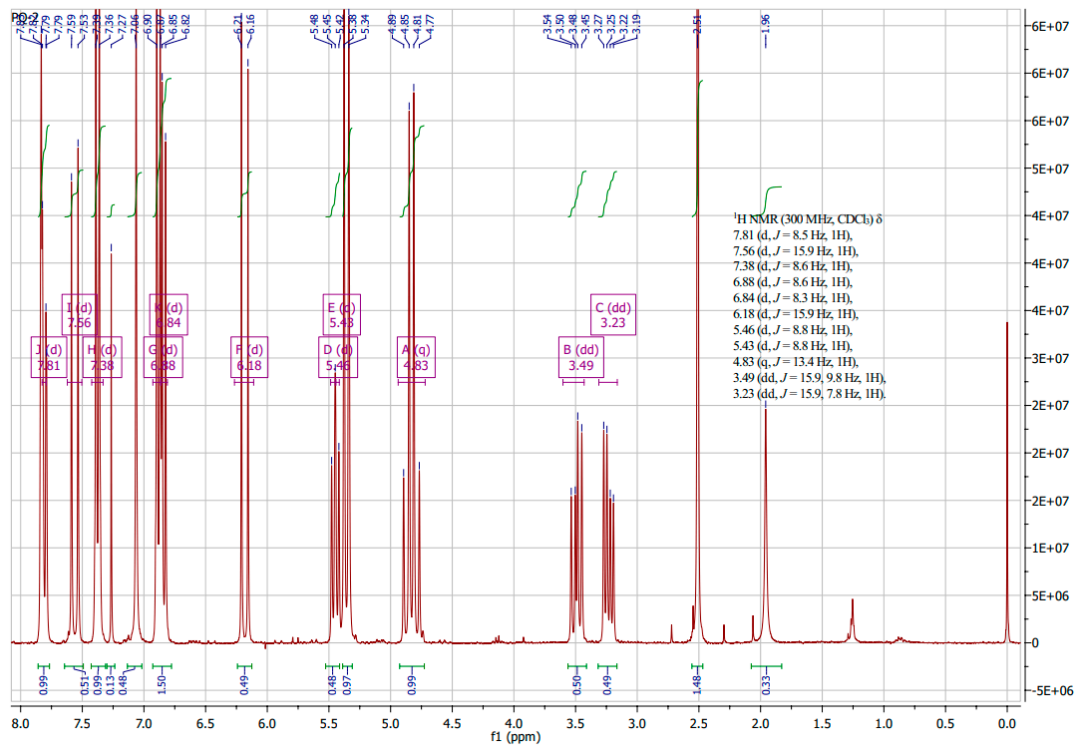

S2k. Proton NMR spectra of compound 7 (zoom).

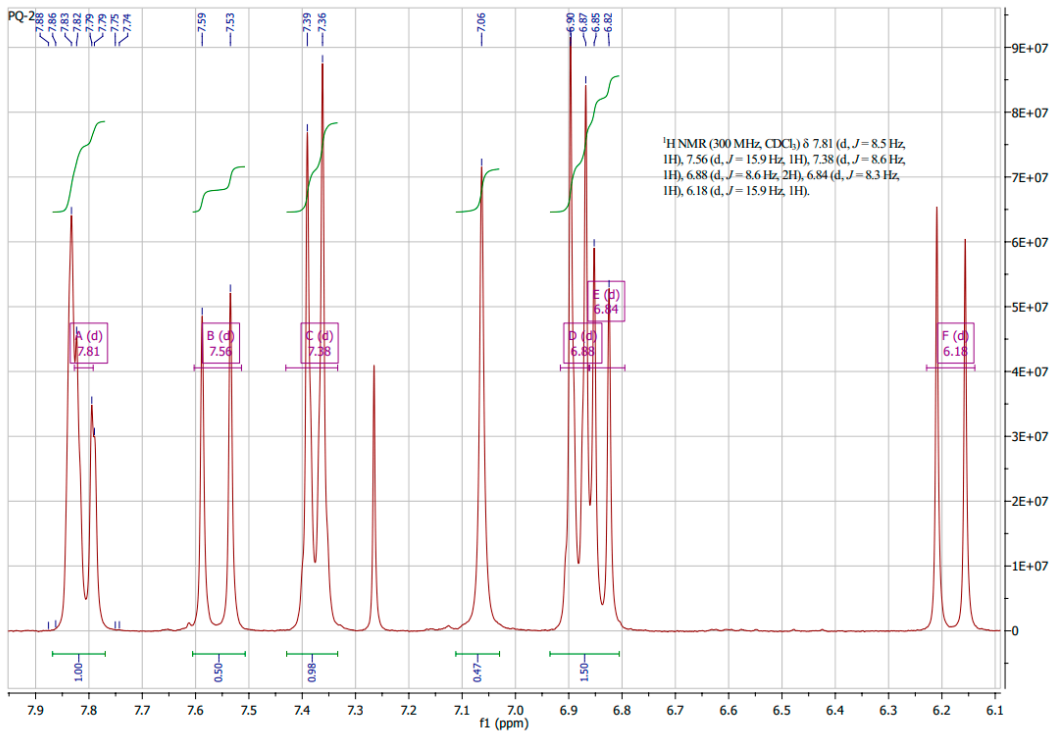

### S2l. Proton NMR spectra of compound 7 (zoom).

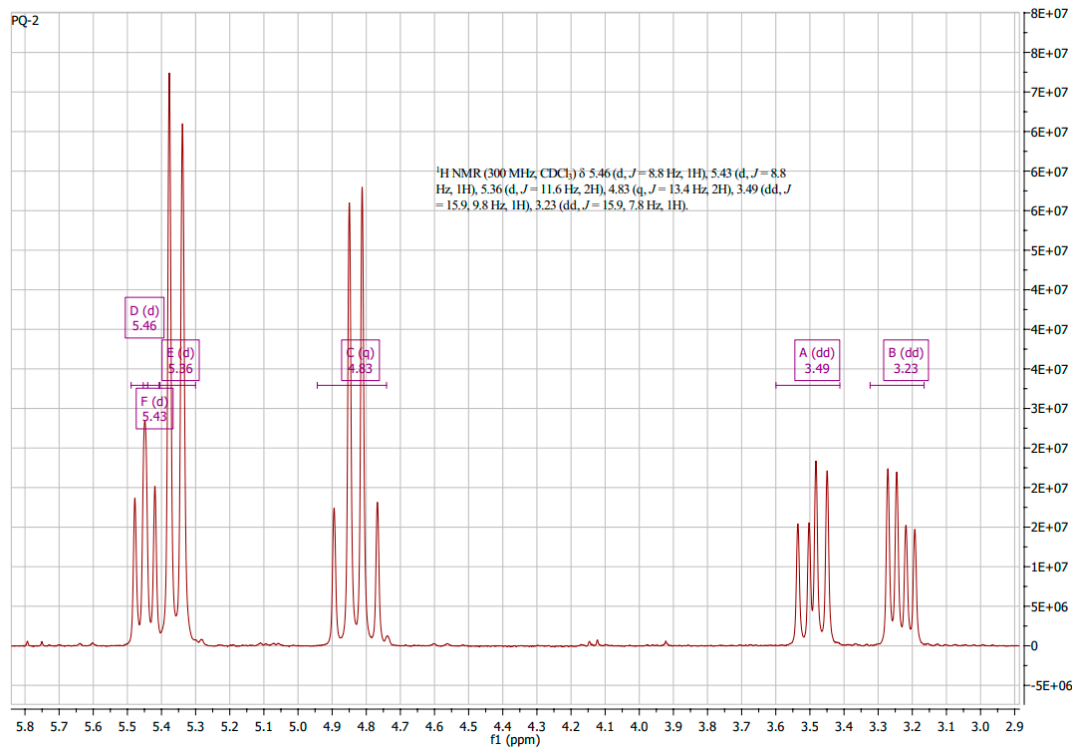

### S2m. Carbon NMR spectra of compound 7.

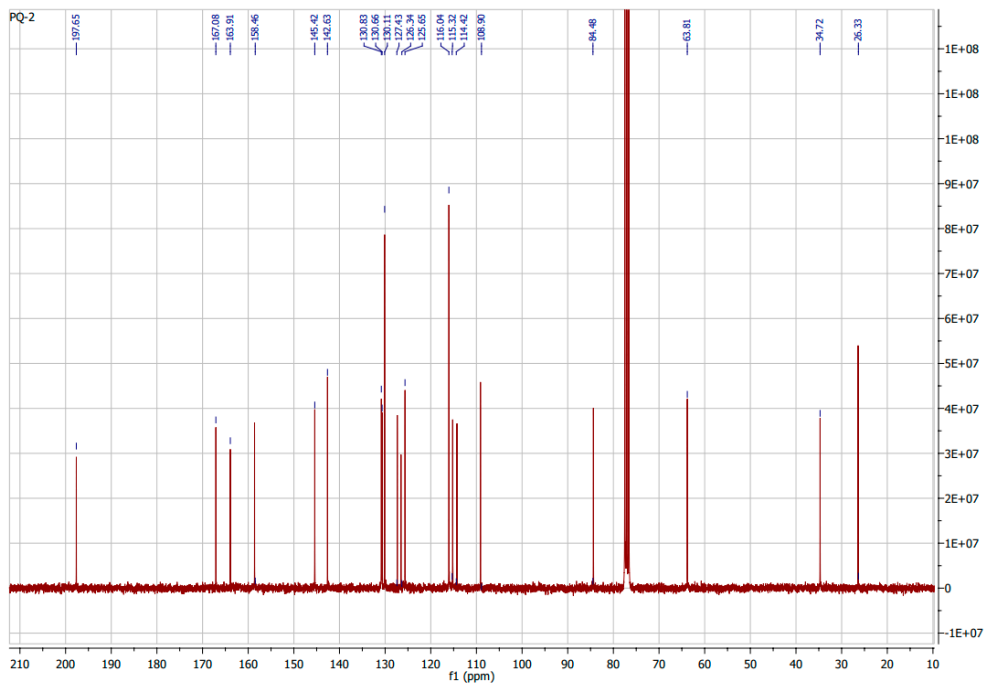

### S2n. HMBC spectra of compound 7

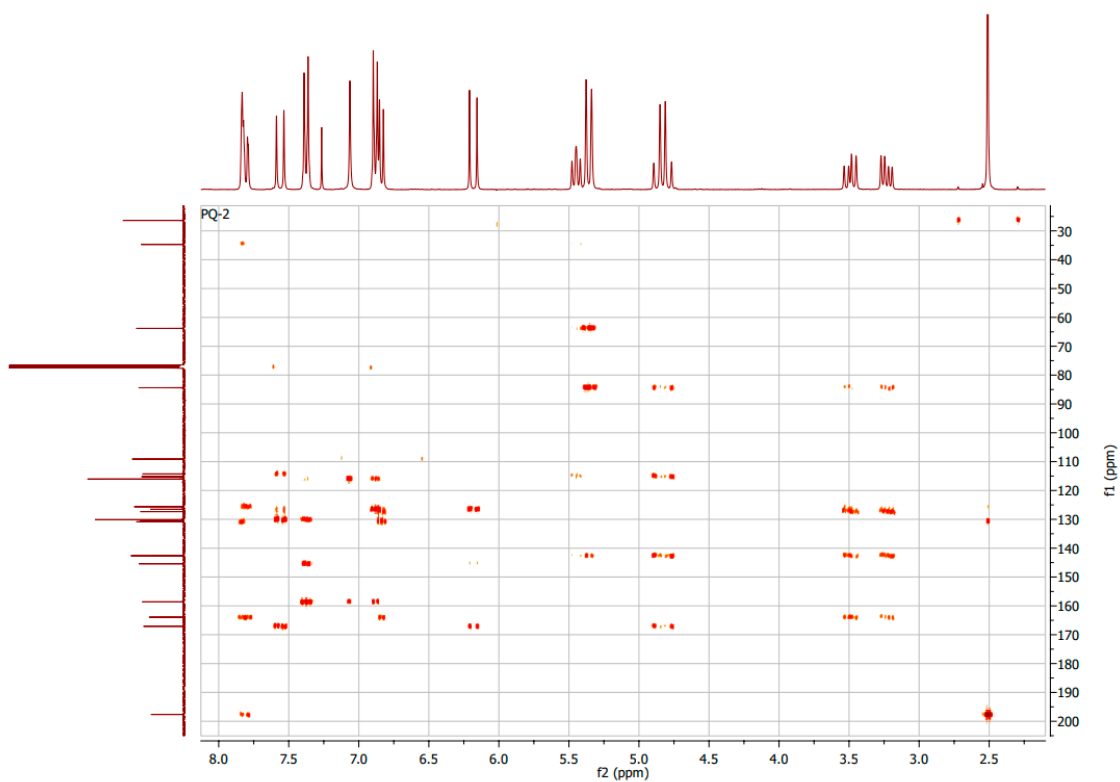

S20. HSQC spectra of compound 7

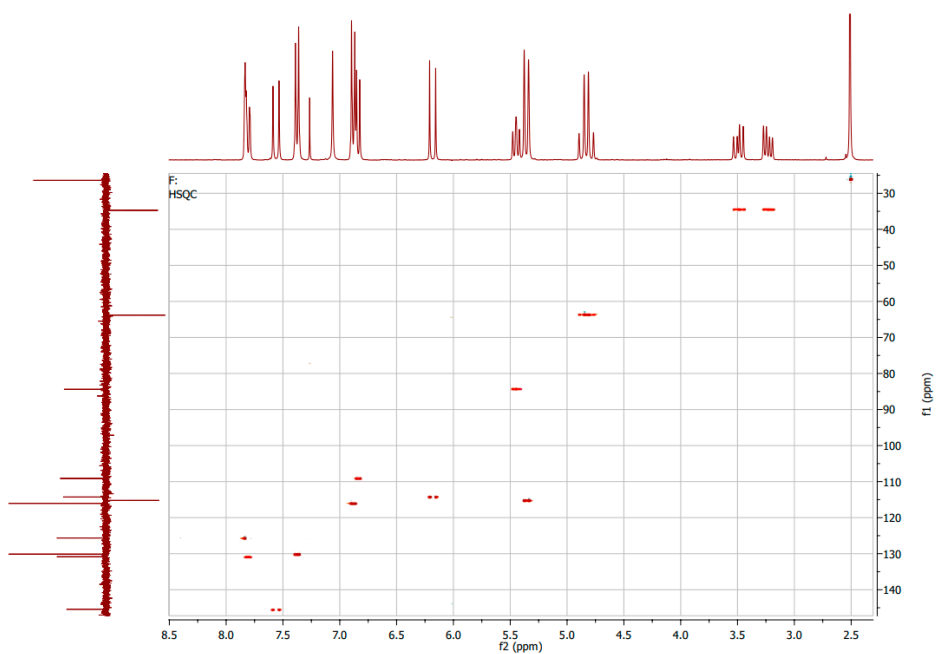

Supplement: molecules-23-02361-s001.pdf [file molecules-23-02361-s001.pdf]
